# Supplementary material for: A dissolving and glucose-responsive insulin-releasing microneedle patch for type 1 diabetes therapy
Source: Royal Society of Chemistry journal article supplement (doi:10.1039/d0tb02133d), 2020-11-21
Supplement: d0tb02133d1.pdf [file d0tb02133d1.pdf]

## Supporting Information

### **A dissolving and glucose-responsive insulin releasing microneedle patch for type 1 diabetes therapy**

Yujie Zhang <sup>a</sup>, Mingxin Wu <sup>a</sup>, Di Tan <sup>a</sup>, Quan Liu <sup>a</sup>, Re Xia <sup>a</sup>,  
Min Chen <sup>b</sup>, Yuangang Liu <sup>c</sup>, Longjian Xue <sup>a</sup>, and Yifeng Lei <sup>a,\*</sup>

<sup>a</sup> The Institute of Technological Science & School of Power and Mechanical Engineering, Wuhan University, 430072, Wuhan, China

\* E-mail: yifenglei@whu.edu.cn (Y.F. Lei)

<sup>b</sup> Department of Internal Medicine & Geriatrics, Wuhan University Zhongnan Hospital, Wuhan 430071, China

<sup>c</sup> College of Chemical Engineering, Huaqiao University, Xiamen 361021, China

**Table S1.** Description of gold nanocarriers and MN patches in present study

| AuNCs                  | Solution color | PBA molecule         | Nanocarrier name               | MN patch name |
|------------------------|----------------|----------------------|--------------------------------|---------------|
| CR <sub>9</sub> -AuNCs | Yellow-green   | COOH-FPBA            | CR <sub>9</sub> -AuNC-FPBA-Ins | MN-FPBA       |
| BSA-AuNCs              | Brown          | NH <sub>2</sub> -PBA | BSA-AuNC-PBA-Ins               | MN-BSA        |

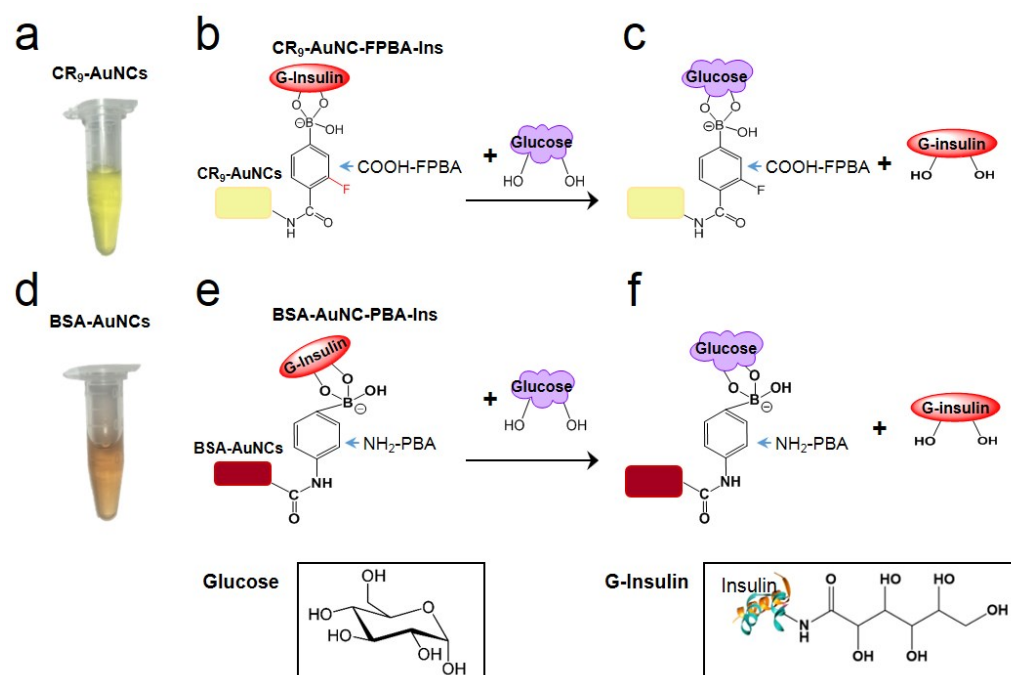

**Figure S1.** The gold nanocarriers used in this study. (a) Appearance of solution of CR<sub>9</sub>-AuNCs. (b-c) Glucose-responsive drug releasing mechanism of CR<sub>9</sub>-AuNCs-FPBA-Ins nanocarriers. (d) Appearance of solution of BSA-AuNCs. (e-f) Drug releasing mechanism of BSA-AuNCs-PBA-Ins nanocarriers.

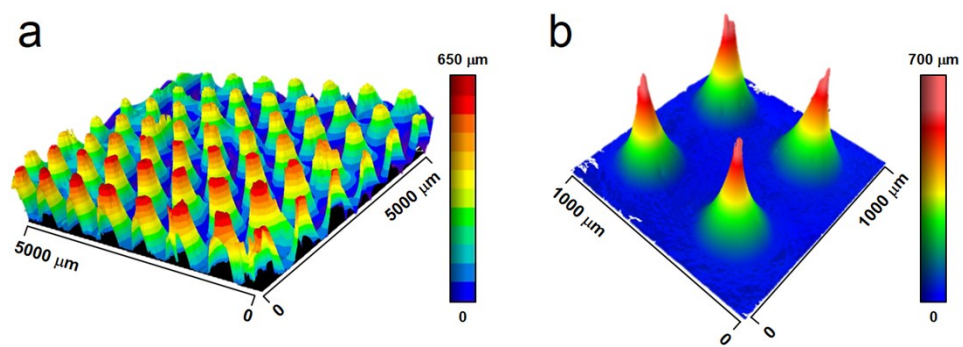

**Figure S2.** 3D profiler images of the fabricated MN patches.

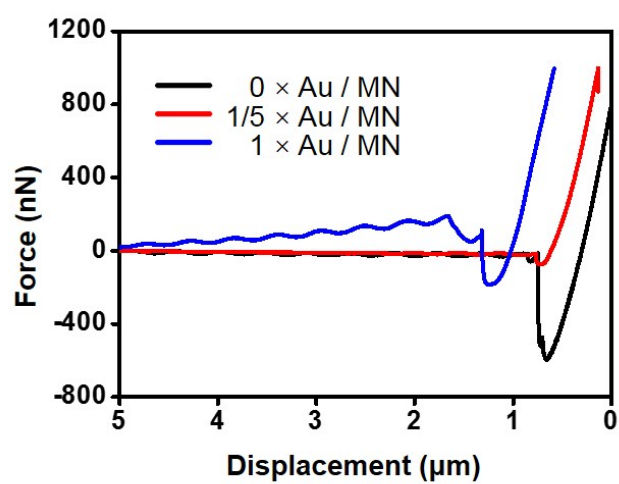

**Figure S3.** Force-displacement curve of the MN during AFM indentation measurement.

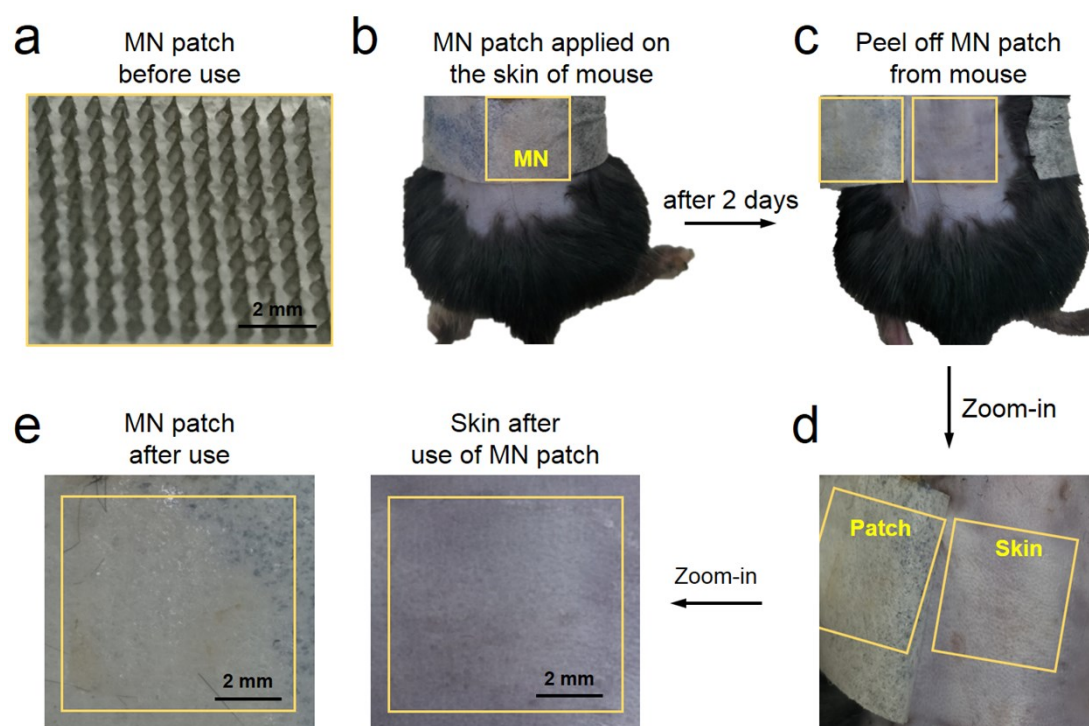

**Figure S4.** Comparison of MN patch before and after application on the skin of mice. (a) Photograph of a fabricated MN patch. (b) Image of a MN patch applied on the dorsal skin of mice. The yellow box indicates the place of MN patch. (c) Peeling off the MN patch from the skin of mouse. (d-e) Zoomed-in images of the residual MN path and the skin after application for 2 days.

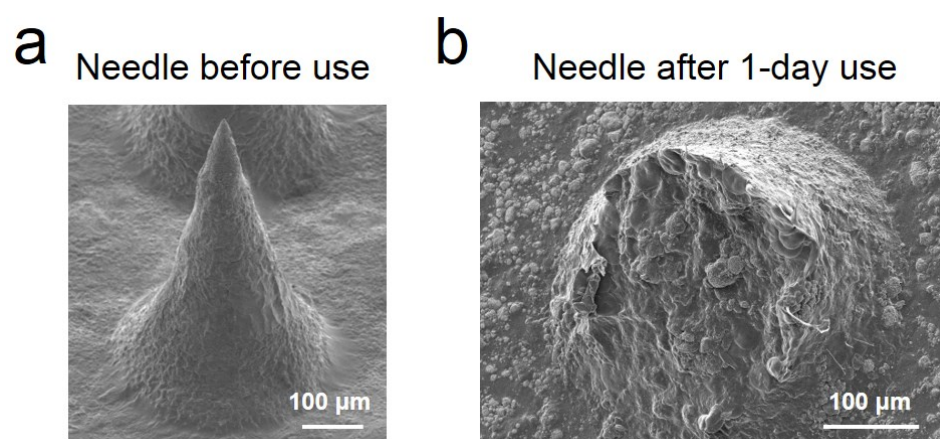

**Figure S5.** SEM images of a needle before use (a), and after 1-day use on the skin of mouse (b).

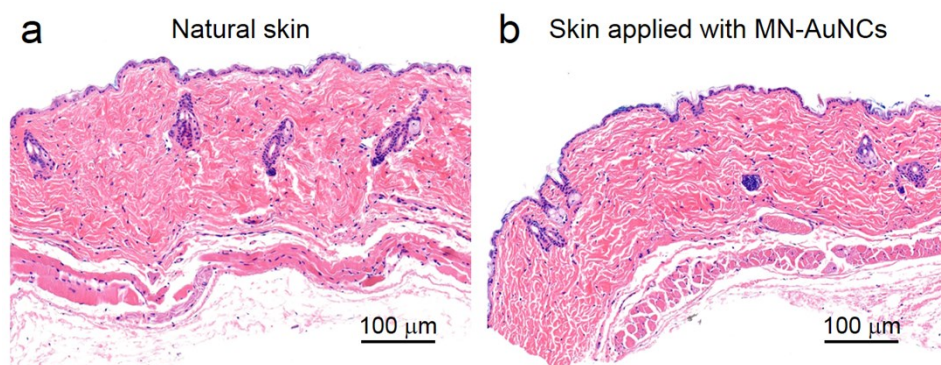

**Figure S6.** Images of H&E staining of the natural skin of mouse (a), and the mouse skin after 2-day application of MN-AuNCs patch (b).
